# Supplementary material for: SANTA: Quantifying the Functional Content of Molecular Networks
Source: PubMed Central journal article supplement (PMC4161294; doi:10.1371/journal.pcbi.1003808), 2014-09-11
Supplement: pcbi.1003808.s004.pdf [file pcbi.1003808.s004.pdf]

**Supplementary Table 1. GO terms differentially associated with the network of raw GIs and GI profile correlations**

| GO Term                                                                                   | $P_{raw}$ | $P_{cor}$ | D      | Size |
|-------------------------------------------------------------------------------------------|-----------|-----------|--------|------|
| structural constituent of ribosome                                                        | 3.216e-06 | 5.366e-46 | 39.778 | 100  |
| cytosolic small ribosomal subunit                                                         | 4.779e-09 | 2.482e-33 | 24.285 | 42   |
| maturation of SSU-rRNA from tricistronic rRNA transcript (SSU-rRNA; 5.8S rRNA; LSU-rRNA)  | 7.094e-04 | 4.185e-26 | 22.229 | 37   |
| piecemeal microautophagy of nucleus                                                       | 3.355e-03 | 1.788e-24 | 21.273 | 31   |
| 90S preribosome                                                                           | 1.155e-05 | 4.105e-24 | 18.449 | 30   |
| ribosome assembly                                                                         | 1.125e-02 | 7.359e-21 | 18.184 | 23   |
| mRNA splicing; via spliceosome                                                            | 1.053e-15 | 7.320e-34 | 18.158 | 48   |
| mitotic sister chromatid cohesion                                                         | 3.523e-12 | 4.467e-30 | 17.897 | 26   |
| mitochondrial respiratory chain                                                           | 2.741e-05 | 5.546e-23 | 17.694 | 20   |
| ribosomal large subunit biogenesis                                                        | 2.951e-06 | 2.614e-23 | 17.053 | 31   |
| cytosolic large ribosomal subunit                                                         | 7.900e-03 | 7.239e-19 | 16.038 | 54   |
| nuclear replication fork                                                                  | 3.886e-11 | 2.012e-25 | 14.286 | 23   |
| mitochondrial membrane organization                                                       | 2.512e-08 | 1.370e-22 | 14.263 | 30   |
| preribosome; large subunit precursor                                                      | 1.311e-03 | 1.636e-17 | 13.904 | 22   |
| cytoplasmic microtubule                                                                   | 6.969e-08 | 7.656e-20 | 11.959 | 21   |
| cell division site part                                                                   | 1.060e-07 | 4.203e-19 | 11.402 | 21   |
| rRNA binding                                                                              | 2.483e-02 | 1.390e-13 | 11.252 | 24   |
| regulation of pH                                                                          | 3.710e-05 | 1.446e-15 | 10.409 | 21   |
| tubulin binding                                                                           | 1.100e-13 | 1.015e-23 | 10.035 | 26   |
| DNA-directed RNA polymerase II; holoenzyme                                                | 4.162e-08 | 4.636e-18 | 9.953  | 27   |
| mating projection tip                                                                     | 1.541e-12 | 4.720e-22 | 9.514  | 74   |
| U2-type spliceosomal complex                                                              | 6.987e-08 | 2.973e-17 | 9.371  | 20   |
| CVT pathway                                                                               | 8.063e-04 | 1.262e-12 | 8.805  | 33   |
| oxidative phosphorylation                                                                 | 2.683e-03 | 5.283e-12 | 8.706  | 20   |
| maturation of 5.8S rRNA from tricistronic rRNA transcript (SSU-rRNA; 5.8S rRNA; LSU-rRNA) | 3.070e-05 | 8.746e-14 | 8.545  | 27   |
| cellular component movement                                                               | 1.423e-07 | 1.887e-15 | 7.878  | 21   |
| pre-autophagosomal structure                                                              | 9.734e-02 | 2.004e-09 | 7.686  | 27   |
| spindle pole body                                                                         | 2.412e-10 | 2.444e-17 | 6.994  | 49   |
| mitochondrial translation                                                                 | 9.621e-09 | 1.086e-15 | 6.947  | 22   |
| small nuclear ribonucleoprotein complex                                                   | 1.698e-10 | 2.651e-17 | 6.807  | 25   |
| regulation of DNA-dependent DNA replication                                               | 1.436e-06 | 2.339e-13 | 6.788  | 22   |
| incipient cellular bud site                                                               | 4.199e-06 | 9.896e-13 | 6.628  | 41   |
| transcription initiation from RNA polymerase II promoter                                  | 1.816e-05 | 5.915e-12 | 6.487  | 22   |
| protein-DNA complex assembly                                                              | 1.461e-14 | 1.451e-20 | 6.003  | 51   |
| DNA replication initiation                                                                | 1.331e-10 | 1.628e-16 | 5.912  | 27   |
| mitotic recombination                                                                     | 3.332e-05 | 7.137e-11 | 5.669  | 25   |
| proteasome complex                                                                        | 6.895e-04 | 1.790e-09 | 5.586  | 23   |
| endosome membrane                                                                         | 2.454e-04 | 6.674e-10 | 5.566  | 65   |
| protein complex localization                                                              | 3.506e-04 | 1.505e-09 | 5.367  | 29   |
| establishment of organelle localization                                                   | 1.340e-12 | 1.693e-17 | 4.898  | 58   |
| cleavage involved in rRNA processing                                                      | 3.091e-06 | 4.239e-11 | 4.863  | 24   |
| ER-associated protein catabolic process                                                   | 1.047e-05 | 2.565e-10 | 4.611  | 36   |
| protein-DNA complex                                                                       | 1.216e-08 | 3.838e-13 | 4.501  | 29   |
| protein heterodimerization activity                                                       | 9.517e-08 | 3.372e-12 | 4.451  | 23   |
| macroautophagy                                                                            | 2.331e-05 | 1.906e-09 | 4.087  | 40   |
| late endosome to vacuole transport via multivesicular body sorting pathway                | 4.135e-05 | 3.701e-09 | 4.048  | 21   |
| ER to Golgi vesicle-mediated transport                                                    | 2.683e-09 | 3.078e-13 | 3.940  | 62   |
| protein import into nucleus                                                               | 1.322e-10 | 2.760e-14 | 3.680  | 34   |
| chromatin binding                                                                         | 1.425e-08 | 5.731e-12 | 3.396  | 57   |
| condensed nuclear chromosome kinetochore                                                  | 3.116e-11 | 2.051e-14 | 3.182  | 29   |
| transcription cofactor activity                                                           | 2.315e-07 | 2.091e-10 | 3.044  | 32   |
| double-strand break repair via homologous recombination                                   | 1.100e-11 | 1.267e-14 | 2.938  | 31   |
| nuclear pore                                                                              | 3.408e-10 | 5.525e-13 | 2.790  | 38   |
| intracellular protein transmembrane import                                                | 7.411e-07 | 1.878e-09 | 2.596  | 43   |
| regulation of cytoskeleton organization                                                   | 5.515e-08 | 1.593e-10 | 2.539  | 36   |
| nucleosome organization                                                                   | 6.464e-10 | 1.995e-12 | 2.511  | 45   |
| tRNA wobble uridine modification                                                          | 2.115e-08 | 1.493e-10 | 2.151  | 20   |
| histone acetyltransferase complex                                                         | 3.795e-11 | 3.027e-13 | 2.098  | 31   |
| chromatin assembly                                                                        | 7.977e-08 | 5.181e-09 | 1.187  | 30   |
| nuclear chromatin                                                                         | 3.243e-11 | 4.395e-12 | 0.868  | 100  |
| cellular bud tip                                                                          | 2.527e-08 | 3.858e-09 | 0.816  | 77   |
| mRNA export from nucleus                                                                  | 1.050e-09 | 2.789e-10 | 0.576  | 36   |
| spindle organization                                                                      | 2.786e-09 | 1.666e-09 | 0.223  | 22   |
| transcription elongation from RNA polymerase II promoter                                  | 1.244e-10 | 9.306e-10 | -0.874 | 36   |
| cellular response to heat                                                                 | 7.232e-09 | 4.009e-07 | -1.744 | 29   |
| protein transporter activity                                                              | 2.648e-09 | 2.604e-07 | -1.993 | 38   |
| nuclear membrane                                                                          | 8.396e-09 | 1.825e-05 | -3.337 | 52   |

Only those GO terms that associate strongly ( $p < 1 \times 10^{-8}$ ) with either or both networks are listed.  $D = \log_{10}(P_{raw}) - \log_{10}(P_{correlation})$ . If  $D < 0$ , then the GO term associates more strongly with the network of raw GIs. If  $D > 0$ , then the GO term associates more strongly with the network of GI profile correlations. The set size is the number of network genes annotated with the GO term.
