# Supplementary material for: SANTA: Quantifying the Functional Content of Molecular Networks
Source: PubMed Central journal article supplement (PMC4161294; doi:10.1371/journal.pcbi.1003808), 2014-09-11
Supplement: pcbi.1003808.s005.pdf [file pcbi.1003808.s005.pdf]

**Supplementary Table 2. GO terms differentially associated with the untreated and MMS-treated GI networks**

| GO Term                                                                 | $p_{untreated}$ | $p_{treated}$ | D       | Size |
|-------------------------------------------------------------------------|-----------------|---------------|---------|------|
| DNA repair                                                              | 1.030e-19       | 1.714e-31     | 11.7787 | 25   |
| response to DNA damage stimulus                                         | 1.558e-17       | 6.604e-29     | 11.3728 | 57   |
| covalent chromatin modification                                         | 6.059e-06       | 8.203e-14     | 7.8684  | 53   |
| histone modification                                                    | 2.047e-06       | 1.852e-13     | 7.0435  | 25   |
| chromosome organization                                                 | 6.043e-26       | 5.830e-30     | 4.0155  | 49   |
| chromatin organization                                                  | 5.586e-19       | 6.981e-22     | 2.9032  | 45   |
| cell cycle checkpoint                                                   | 8.511e-02       | 1.556e-04     | 2.7378  | 35   |
| DNA replication                                                         | 1.080e-09       | 7.740e-12     | 2.1447  | 68   |
| regulation of cell cycle process                                        | 3.428e-04       | 2.481e-06     | 2.1403  | 70   |
| regulation of cell cycle phase transition                               | 1.136e-01       | 9.341e-04     | 2.0852  | 25   |
| negative regulation of cell cycle phase transition                      | 1.146e-01       | 9.950e-04     | 2.0615  | 38   |
| chromatin silencing at telomere                                         | 1.206e-05       | 1.834e-07     | 1.8179  | 60   |
| negative regulation of cell cycle process                               | 3.214e-02       | 4.984e-04     | 1.8094  | 21   |
| meiotic cell cycle                                                      | 9.129e-05       | 2.074e-06     | 1.6437  | 31   |
| chromatin modification                                                  | 1.021e-18       | 3.421e-20     | 1.4748  | 21   |
| regulation of gene expression, epigenetic                               | 4.536e-07       | 8.062e-08     | 0.7502  | 60   |
| meiosis                                                                 | 2.510e-04       | 9.482e-05     | 0.4227  | 25   |
| cell cycle process                                                      | 5.551e-05       | 2.312e-05     | 0.3804  | 37   |
| macromolecular complex subunit organization                             | 1.993e-05       | 1.086e-05     | 0.2636  | 93   |
| chromatin silencing                                                     | 1.599e-07       | 1.172e-07     | 0.1348  | 92   |
| negative regulation of gene expression, epigenetic                      | 2.092e-08       | 1.945e-08     | 0.0317  | 47   |
| negative regulation of nitrogen compound metabolic process              | 6.611e-05       | 1.718e-04     | -0.4148 | 86   |
| negative regulation of cellular biosynthetic process                    | 1.626e-04       | 5.199e-04     | -0.5049 | 31   |
| negative regulation of gene expression                                  | 4.667e-04       | 1.818e-03     | -0.5907 | 32   |
| negative regulation of biosynthetic process                             | 9.265e-05       | 4.724e-04     | -0.7074 | 56   |
| negative regulation of nucleobase-containing compound metabolic process | 4.452e-05       | 2.416e-04     | -0.7346 | 24   |
| gene silencing                                                          | 2.795e-07       | 1.698e-06     | -0.7835 | 24   |
| negative regulation of transcription, DNA-dependent                     | 4.342e-04       | 3.159e-03     | -0.8618 | 99   |
| negative regulation of macromolecule biosynthetic process               | 8.533e-05       | 6.318e-04     | -0.8695 | 93   |
| negative regulation of cellular macromolecule biosynthetic process      | 3.925e-05       | 2.929e-04     | -0.8729 | 87   |
| negative regulation of RNA metabolic process                            | 2.199e-04       | 2.581e-03     | -1.0694 | 81   |
| organelle fission                                                       | 3.156e-04       | 3.704e-03     | -1.0695 | 31   |
| nuclear division                                                        | 3.082e-04       | 4.218e-03     | -1.1363 | 96   |
| mitosis                                                                 | 1.761e-04       | 5.808e-03     | -1.5183 | 96   |
| chromatin remodeling                                                    | 1.393e-10       | 2.229e-08     | -2.2041 | 84   |
| mitotic cell cycle                                                      | 3.256e-07       | 3.155e-04     | -2.9863 | 46   |
| chromatin                                                               | 1.402e-11       | 2.619e-08     | -3.2712 | 61   |
| protein-DNA complex subunit organization                                | 1.957e-08       | 4.883e-05     | -3.3970 | 98   |
| chromosome                                                              | 7.535e-21       | 2.076e-17     | -3.4402 | 31   |
| nuclear chromatin                                                       | 1.881e-10       | 7.399e-07     | -3.5947 | 52   |
| intracellular non-membrane-bounded organelle                            | 2.078e-21       | 9.921e-18     | -3.6788 | 31   |
| nucleoplasm part                                                        | 1.691e-10       | 1.041e-06     | -3.7894 | 84   |
| nucleoplasm                                                             | 2.737e-13       | 4.722e-09     | -4.2368 | 88   |
| intracellular organelle lumen                                           | 8.280e-25       | 2.281e-19     | -5.4401 | 25   |
| chromosomal part                                                        | 1.017e-16       | 4.537e-11     | -5.6496 | 20   |
| nuclear chromosome                                                      | 8.379e-18       | 6.611e-12     | -5.8970 | 88   |
| DNA metabolic process                                                   | 6.428e-38       | 6.334e-32     | -5.9936 | 84   |
| membrane-enclosed lumen                                                 | 6.189e-23       | 6.189e-17     | -6.0000 | 74   |
| nuclear chromosome part                                                 | 3.722e-15       | 3.983e-09     | -6.0295 | 39   |
| organelle lumen                                                         | 1.566e-24       | 2.673e-18     | -6.2321 | 84   |
| nuclear part                                                            | 1.321e-27       | 4.292e-21     | -6.5117 | 21   |
| non-membrane-bounded organelle                                          | 1.024e-24       | 4.131e-18     | -6.6057 | 26   |
| nuclear lumen                                                           | 6.551e-29       | 7.455e-21     | -8.0561 | 26   |
| regulation of DNA metabolic process                                     | 9.805e-15       | 1.875e-05     | -9.2815 | 92   |

Only those GO terms that associate strongly ( $p < 0.001$ ) with either or both networks are listed.  $D = \log_{10}(p_{untreated}) - \log_{10}(p_{treated})$ . If  $D < 0$ , then the GO term associates more strongly with the untreated network. If  $D > 0$ , then the GO term associates more strongly with the MMS-treated network. The set size is the number of network genes annotated with the GO term.
