# Supplementary material for: SANTA: Quantifying the Functional Content of Molecular Networks
Source: PubMed Central journal article supplement (PMC4161294; doi:10.1371/journal.pcbi.1003808), 2014-09-11
Supplement: pcbi.1003808.s006.pdf [file pcbi.1003808.s006.pdf]

**Supplementary Table 3. GO terms differentially associated with the untreated and UV-treated GI networks**

| GO Term                                                              | $p_{untreated}$ | $p_{treated}$ | D      | Size |
|----------------------------------------------------------------------|-----------------|---------------|--------|------|
| meiosis I                                                            | 5.920e-01       | 2.616e-06     | 5.355  | 50   |
| recombinational repair                                               | 5.895e-01       | 3.124e-06     | 5.276  | 20   |
| DNA recombination                                                    | 6.899e-01       | 4.236e-06     | 5.212  | 26   |
| double-strand break repair                                           | 1.603e-01       | 1.090e-06     | 5.168  | 87   |
| structure-specific DNA binding                                       | 2.033e-01       | 4.251e-06     | 4.680  | 77   |
| transcription factor binding transcription factor activity           | 1.721e-02       | 5.523e-06     | 3.494  | 61   |
| meiosis                                                              | 5.581e-01       | 2.432e-04     | 3.361  | 52   |
| nucleotide-excision repair                                           | 5.063e-02       | 2.581e-05     | 3.293  | 20   |
| DNA-dependent ATPase activity                                        | 9.435e-02       | 4.940e-05     | 3.281  | 31   |
| double-strand break repair via homologous recombination              | 4.662e-01       | 2.507e-04     | 3.269  | 32   |
| meiotic cell cycle                                                   | 5.048e-01       | 5.004e-04     | 3.004  | 32   |
| ATPase activity, coupled                                             | 1.488e-01       | 2.004e-04     | 2.871  | 48   |
| double-stranded DNA binding                                          | 9.225e-03       | 2.018e-05     | 2.660  | 67   |
| transcription cofactor activity                                      | 1.744e-01       | 7.149e-04     | 2.387  | 34   |
| helicase activity                                                    | 9.320e-02       | 6.406e-04     | 2.163  | 41   |
| protein-DNA complex subunit organization                             | 2.031e-03       | 2.535e-05     | 1.904  | 76   |
| SWI/SNF superfamily-type complex                                     | 1.056e-03       | 2.970e-05     | 1.551  | 46   |
| negative regulation of transcription from RNA polymerase II promoter | 4.932e-03       | 1.627e-04     | 1.482  | 46   |
| protein binding transcription factor activity                        | 1.932e-02       | 8.910e-04     | 1.336  | 24   |
| chromatin remodeling                                                 | 1.536e-04       | 5.720e-05     | 0.429  | 36   |
| transcription from RNA polymerase I promoter                         | 8.148e-04       | 4.306e-04     | 0.277  | 50   |
| covalent chromatin modification                                      | 4.643e-04       | 6.167e-04     | -0.123 | 90   |
| DNA-dependent transcription, elongation                              | 5.615e-04       | 1.514e-03     | -0.431 | 37   |
| nucleosome organization                                              | 1.041e-05       | 7.832e-05     | -0.877 | 35   |
| chromatin assembly                                                   | 8.163e-04       | 1.174e-02     | -1.158 | 39   |
| histone modification                                                 | 8.095e-05       | 2.599e-03     | -1.507 | 77   |
| endosomal transport                                                  | 9.833e-04       | 3.323e-02     | -1.529 | 70   |
| DNA packaging                                                        | 1.223e-05       | 7.683e-03     | -2.798 | 70   |
| nuclear chromatin                                                    | 1.772e-09       | 1.310e-06     | -2.869 | 26   |
| establishment of protein localization to vacuole                     | 1.871e-05       | 2.347e-02     | -3.099 | 28   |
| chromatin silencing at telomere                                      | 1.559e-08       | 3.392e-05     | -3.337 | 39   |
| vacuolar transport                                                   | 4.349e-06       | 2.051e-02     | -3.674 | 76   |
| protein targeting to vacuole                                         | 2.582e-06       | 1.363e-02     | -3.722 | 55   |
| chromatin silencing at silent mating-type cassette                   | 9.137e-07       | 2.088e-02     | -4.359 | 44   |
| negative regulation of gene expression, epigenetic                   | 6.990e-09       | 4.060e-04     | -4.764 | 76   |
| chromatin                                                            | 1.499e-13       | 1.943e-08     | -5.113 | 93   |
| protein localization to vacuole                                      | 5.691e-08       | 1.360e-02     | -5.378 | 32   |
| chromatin silencing                                                  | 8.118e-11       | 2.587e-04     | -6.503 | 71   |
| gene silencing                                                       | 4.754e-12       | 2.388e-04     | -7.701 | 37   |
| regulation of gene expression, epigenetic                            | 2.138e-14       | 4.675e-05     | -9.340 | 36   |

Only those GO terms that associate strongly ( $p < 0.001$ ) with either or both networks are listed.  $D = \log_{10}(p_{untreated}) - \log_{10}(p_{treated})$ . If  $D < 0$ , then the GO term associates more strongly with the untreated network. If  $D > 0$ , then the GO term associates more strongly with the UV-treated network. The set size is the number of network genes annotated with the GO term.
